# Supplementary material
Source: Springer Nature journal article supplement (https://www.springermedizin.de/resource/supplementary/12958_2012_983_MOESM2_ESM.pdf/9566560)

A

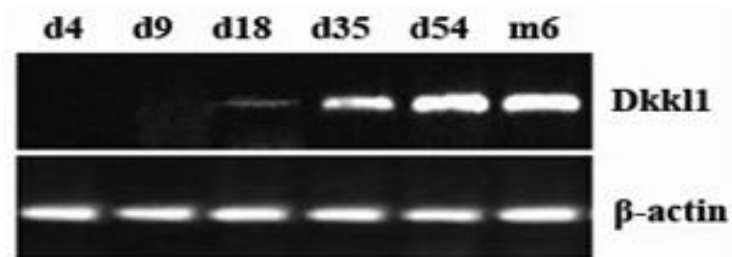

B

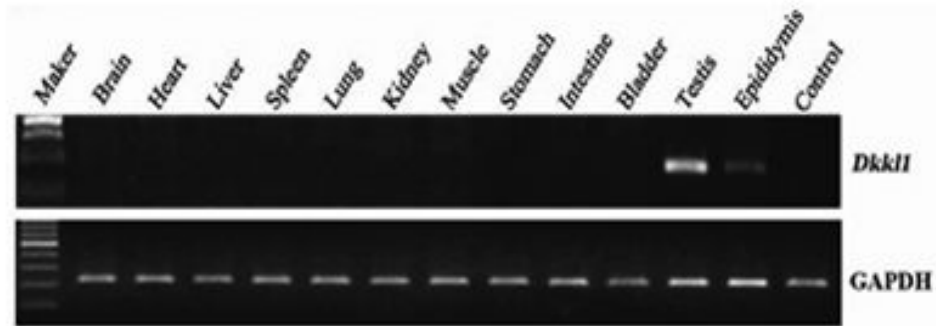

C

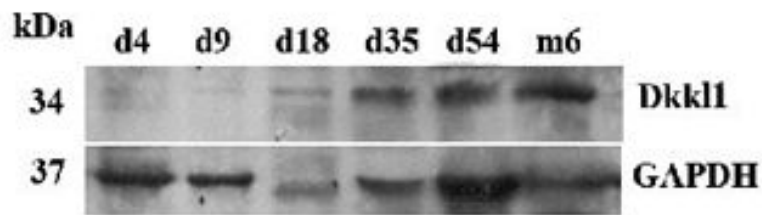

D

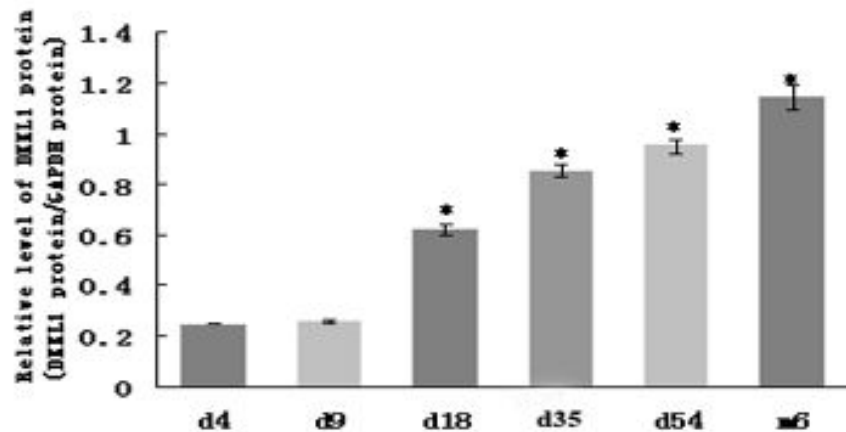

Supplement: MOESM2 [file 9566560]
